# Supplementary material
Source: HighWire-hosted journal article supplement (https://ajnr-sso.highwirestaging.com/highwire/filestream/78762/field_highwire_adjunct_files/0/19-00680.pdf)
Supplement: 19-00680.pdf [file 19-00680.pdf]

**On-line Table: Agreement between tumor invasion assessment in 45 anatomic regions**

| Region Extension           | Total Number of Lesions | κ Gadolinium-Free vs Gadolinium Session | κ: 2 Rater Groups, Gadolinium Free | κ: 2 Rater Groups, Gadolinium |
|----------------------------|-------------------------|-----------------------------------------|------------------------------------|-------------------------------|
| Median line involvement    | 6                       | 0.92                                    | 0.85                               | 0.85                          |
| Vascular extension         | 1                       | 0.9                                     | 0.09                               | 0.08                          |
| Mandibular cortical bone   | 10                      | 1                                       | 0.8                                | 0.8                           |
| Mandibular medullary bone  | 8                       | 1                                       | 1                                  | 1                             |
| Intermaxillary commissure  | 4                       | 0.9                                     | 0.86                               | 0.9                           |
| Vestibule                  | 12                      | 1                                       | 0.86                               | 0.86                          |
| Skin                       | 3                       | 0.9                                     | 0.68                               | 0.6                           |
| Mobile tongue              | 6                       | 1                                       | 0.78                               | 0.78                          |
| Palatoglossal arch         | 3                       | 0.85                                    | 0.63                               | 0.65                          |
| Palatine tonsil            | 2                       | 0.87                                    | 0.45                               | 0.28                          |
| Floor of mouth             | 9                       | 1                                       | 0.68                               | 0.68                          |
| Submandibular glands       | 1                       | 1                                       | 0.37                               | 0.37                          |
| Base of the tongue         | 0                       |                                         |                                    |                               |
| Epiglottis                 | 0                       |                                         |                                    |                               |
| Hypopharynx                | 0                       |                                         |                                    |                               |
| Soft palate                | 3                       | 0.95                                    | 0.47                               | 0.41                          |
| Hard palate                | 5                       | 1                                       | 0.82                               | 0.82                          |
| Maxillary bone             | 3                       | 1                                       | 0.91                               | 0.91                          |
| Maxillary sinus            | 3                       | 1                                       | 1                                  | 1                             |
| Masseter muscle            | 4                       | 0.95                                    | 0.82                               | 0.86                          |
| Pterygoid muscles          | 1                       | 0.96                                    | 1                                  | 0.96                          |
| Pterygoid plate            | 1                       | 1                                       | 0.65                               | 0.65                          |
| Temporal muscle            | 1                       | 1                                       | 1                                  | 0.91                          |
| Infratemporal fossa        | 12                      | 1                                       | 0.8                                | 0.8                           |
| Nasopharynx                | 0                       |                                         |                                    |                               |
| Nasal fossa                | 2                       | 0.91                                    | 0.63                               | 0.74                          |
| Ethmoid bone               | 0                       |                                         |                                    |                               |
| Orbital floor              | 0                       |                                         |                                    |                               |
| Sphenoid bone              | 0                       |                                         |                                    |                               |
| Frontal bone               | 0                       |                                         |                                    |                               |
| Subarachnoid spaces        | 1                       | 1                                       | 1                                  | 1                             |
| Cerebral parenchyma        | 0                       |                                         |                                    |                               |
| Prevertebral space         | 0                       |                                         |                                    |                               |
| Prevertebral muscles       | 0                       |                                         |                                    |                               |
| Vertebrae                  | 0                       |                                         |                                    |                               |
| Parotid glands             | 1                       | 0.73                                    | 0.46                               | 0.45                          |
| Facial artery              | 0                       |                                         |                                    |                               |
| Perineural extension (V)   | 1                       | 1                                       | 0.52                               | 0.52                          |
| Perineural extension (VII) | 2                       | 0.79                                    | 0.65                               | 0.39                          |
| Hyoid bone                 | 0                       |                                         |                                    |                               |
| Supraglottis               | 0                       |                                         |                                    |                               |
| Vocal cords                | 0                       |                                         |                                    |                               |
| Subglottis                 | 0                       |                                         |                                    |                               |
| Thyroid cartilage          | 0                       |                                         |                                    |                               |
| Cricoid cartilage          | 0                       |                                         |                                    |                               |

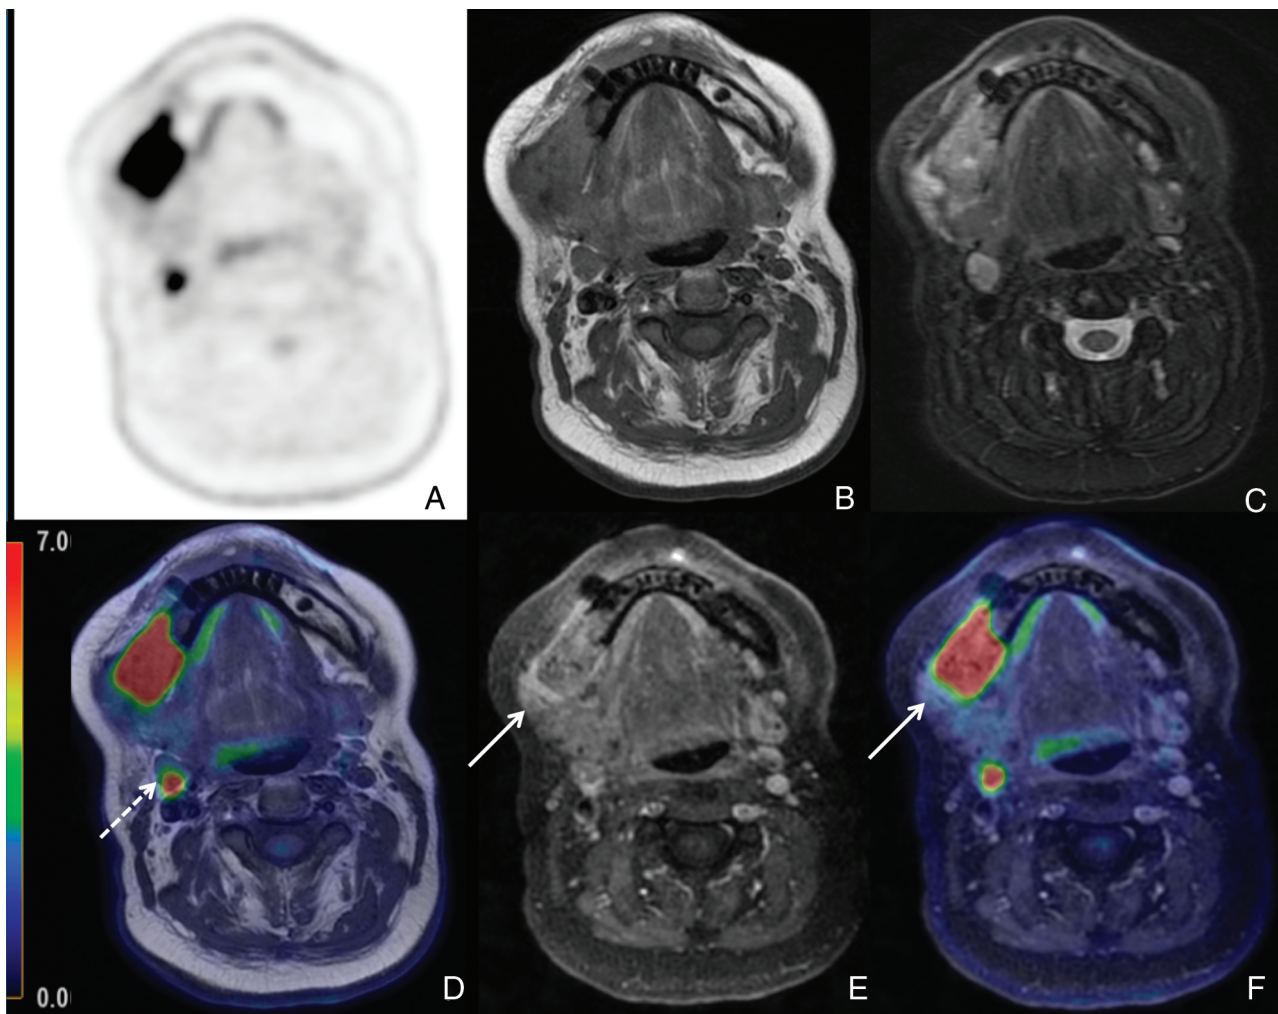

**ON-LINE FIG 1.** Initial staging of a right gingiva-mandibular squamous cell carcinoma in a 46-year-old woman. A, Axial  $^{18}\text{F}$ -FDG-PET image. B, Axial T1-weighted spin-echo (SE) sequence. C, Axial T2-weighted IDEAL sequence. D, Axial T1-weighted SE  $^{18}\text{F}$ -FDG-PET/MR image. E, 3D T1-weighted fat-saturated SE postcontrast sequence, axial plane. F, Axial T1-weighted fat-saturated SE postcontrast fused with  $^{18}\text{F}$ -FDG-PET/MR imaging. Medullary bone invasion of the right mandibular bone is visible on all modalities. FDG-PET has added value by precisely indicating the limits of the perimandibular soft tissue invasion equally when combined with contrast-free (D) or with postgadolinium T1-weighted MR imaging (F). FDG-PET also reveals the absence of right submandibular gland involvement, which was doubtful on MR imaging alone (both contrast-free and postcontrast images).

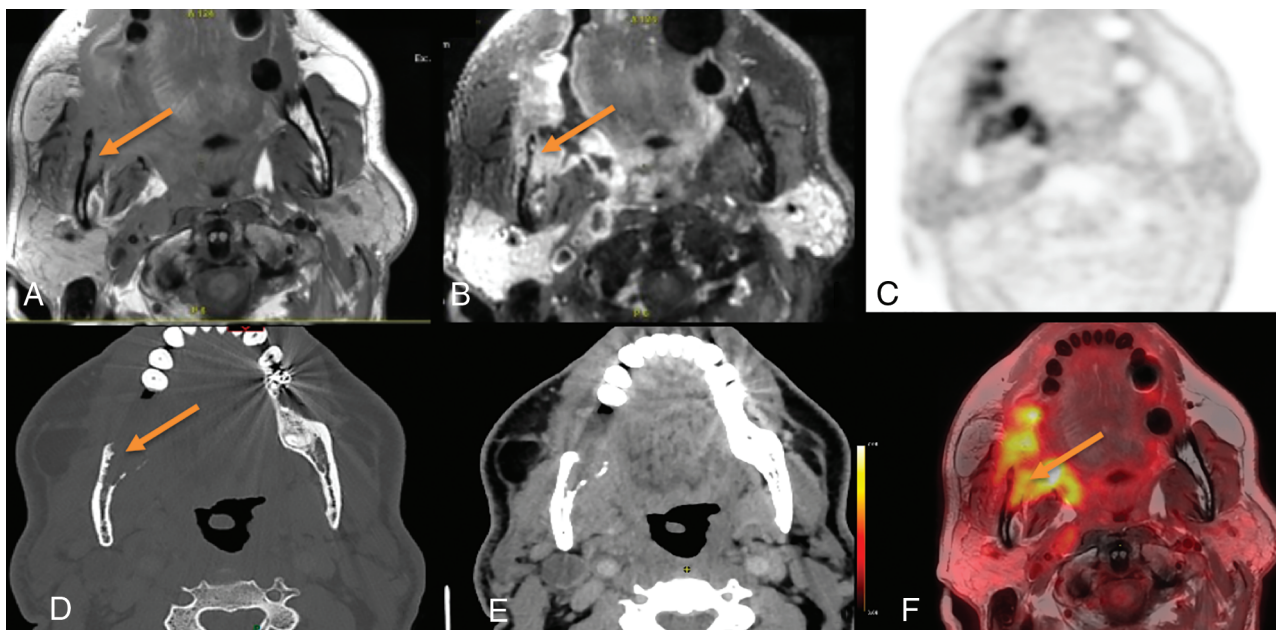

**ON-LINE FIG 2.** Initial staging of right intermaxillary commissure squamous cell carcinoma. *A*, Axial T1W spin-echo (SE) sequence. *B*, 3D T1-weighted fat-saturated SE postcontrast sequence, axial plane. *C*,  $^{18}\text{F}$ -FDG-PET axial image. *D*, CT in bone window, axial plane. *E*, Postcontrast CT, axial plane. *F*, Fusion between axial T1-weighted SE sequence and  $^{18}\text{F}$ -FDG-PET. Both T1-weighted FDG-PET/MR imaging with and without gadolinium showed medullary bone invasion (*arrow*). Whereas the cortical bone involvement is better identified on CT, medullary bone invasion is easily detected on MR imaging (*A* and *B*) and on fused images (*F*). Soft tissue invasion is better identified on both T1W with and without gadolinium contrast (*A* and *B*) than on postcontrast CT (*E*) and the addition of  $^{18}\text{F}$ -FDG-PET increases the precision of tumor delineation (*F*).
